# Supplementary material for: Genome-Editing of FtsZ1 for Alteration of Starch Granule Size in Potato Tubers
Source: MDPI journal article supplement (doi:10.3390/plants12091878), 2023-05-04
Supplement: s1 [file s1]

**Supplementary Table S1.** *Mitochondrial DNA insertion in line 3.16.* The 412 and 777 base pair insertion in line 3.16 aligns with 100% homology to *S. tuberosum* var. 'Desirée' BLAST sequence ID: MN104801.1.

|                                                                                                                                                                                                                                                                                                                                                                                                                                                                                                                                                                                                                                                                                                                                                                                                                                                                                 |
|---------------------------------------------------------------------------------------------------------------------------------------------------------------------------------------------------------------------------------------------------------------------------------------------------------------------------------------------------------------------------------------------------------------------------------------------------------------------------------------------------------------------------------------------------------------------------------------------------------------------------------------------------------------------------------------------------------------------------------------------------------------------------------------------------------------------------------------------------------------------------------|
| <b>Line 3.16 mitochondrial DNA insertion, BLAST ID: MN104801.1.</b>                                                                                                                                                                                                                                                                                                                                                                                                                                                                                                                                                                                                                                                                                                                                                                                                             |
| <b>412 basepair insertion</b>                                                                                                                                                                                                                                                                                                                                                                                                                                                                                                                                                                                                                                                                                                                                                                                                                                                   |
| CTCTACCGACAGATGCGCGAATTGCACTGGTCATTGTGCGGAAT<br>GCCCTCTAAGCCAGTCAGTCAATGGAGGGACCGGGGCGCTAG<br>GTATTTTCTTTCTTCTGGCCGTAGGTGTGATCAATGCCATTGAG<br>CTTCGGTACTCTAAAATAGTAGTCGGAATTCGCTTCTGAGTGAG<br>CTTCCTTCCTTATGCTCTGGCCTGACCTTCACGAACAGCTTTCTT<br>TCAGCTACCAACTTCAAAGCTTGATCTCATCTCTCTTTTGA<br>GTTTAGTACTATTATTGTTGGCATGGAAGGAGTTCATCTTGAATT<br>GCCAGTACAGTGATTGGAGGCCTTCCTCACCTGTTCTAGTGACA<br>TAGGCCCATCCGGTCGAGAGAAGAGACTTGAGATTAGCCACTA<br>GGTGAAGTACCAAGG                                                                                                                                                                                                                                                                                                                                                                                                                     |
| <b>777 basepair insertion</b>                                                                                                                                                                                                                                                                                                                                                                                                                                                                                                                                                                                                                                                                                                                                                                                                                                                   |
| AGAAGAAAGTATTCTGAAGCCAAATGCTCTTGGATGGGTAGTTG<br>AATAGGGGGATAAATCCTTTTTTCTCCTTTATATTGAATGTAGTC<br>AATCATTTTGAGGTCATGAGAACAAAGAGTCATAGAGATGTGAG<br>AAGTTTTGCTTTCGCTATCGACTGACCGTCCTGTTAGCAGTGCT<br>ATACTAGATTGGCACCCCTAACTGGTACCTATACAGCTACTCCTTG<br>TCAGTTGCTATATTTTTTTCACCTTGAGGCTGAGAGGTTAACTCCT<br>TCCACTCTCAACCGCCTTTGCTTATCTTACTAGTAGCTCTATCTAT<br>TGGTACCAGCCAGGGAACTCCCTCTTTGCGAGCTACTTACTTTA<br>TCTGAACCCTCTACCGACAGATGCGCGAATTGCACTGGTCATTG<br>TGCGGAATGCCCTCTAAGCCAGTCAGTCAATGGAGGGACCGGG<br>GCGCTAGGTATTTTCTTTCTTCTGGCCGTAGGTGTGATCAATGC<br>CATTGAGCTTCGGTACTCTAAAATAGTAGTCGGAATTCGCTTCT<br>GAGTGAGCTTCCTTCCTTATGCTCTGGCCTGACCTTCACGAACA<br>GCTTTCTTTCAGCTACCAACTTCAAAGCTTGATCTCATCTCTCTTC<br>TTTTGAAAGTTTAGTACTATTATTGTTGGCATGGAAGGAGTTCAT<br>CTTGAATTGCCAGTACAGTGATTGGAGGCCTTCCTCACCTGTTC<br>TAGTGACATAGGCCCATCCGGTCGAGAGAAGAGACTTGAGATT<br>AGCCACTAGGTGAAGTACCAAGG |

**Supplementary Table S2.** *Microtuber weight and mean area.* Lines of similar weight were chosen in order to avoid the possibility that larger tubers would contain larger starch granules. Weight, mean area, standard deviation, and number of granules measured by ImageJ 1.41 from the National Institute of Health are shown. WT = wild-type.

| Line | Tuber weight (mg) | Granule mean area ( $\mu\text{m}^2$ ) | Standard deviation | n    |
|------|-------------------|---------------------------------------|--------------------|------|
| 1.2  | 10.3              | 157.38                                | 135.53             | 1740 |
| 1.3  | 19.7              | 162.68                                | 150.10             | 1428 |
| 1.5  | 10.6              | 151.70                                | 134.24             | 1943 |
| 2.6  | 10.4              | 123.83                                | 91.77              | 4480 |
| 2.7  | 17.5              | 116.37                                | 76.24              | 3147 |
| 2.9  | 15.3              | 107.47                                | 71.55              | 8150 |
| 3.3  | 23.6              | 197.56                                | 167.06             | 1069 |
| 3.8  | 10                | 175.44                                | 179.68             | 461  |
| 3.9  | 24.6              | 284.90                                | 171.97             | 765  |
| 3.12 | 12.1              | 157.56                                | 128.40             | 2879 |
| 3.13 | 21                | 159.43                                | 123.31             | 2172 |
| 3.16 | 28.4              | 148.80                                | 131.19             | 733  |
| 3.18 | 11.5              | 159.51                                | 141.12             | 707  |
| 4.1  | 25.5              | 165.38                                | 136.89             | 1175 |
| 4.2  | 10.5              | 110.27                                | 97.58              | 1529 |
| 4.3  | 11.2              | 166.59                                | 127.23             | 827  |
| WT-A | 13.6              | 134.33                                | 100.28             | 4062 |
| WT-B | 18.2              | 137.92                                | 108.53             | 1805 |
| WT-C | 29.7              | 143.95                                | 120.28             | 861  |

**Supplementary Table S3.** Primers and gRNAs. Primers and gRNAs used in this study are shown. The top number in the gRNA off-target cell refers to the number of off-targets per number of mismatches. For example, 0-12-24-36-48 means 0 off-targets with 0 mismatches, 12 off-targets with 1 mismatch, 24 off-targets with 2 mismatches, etc. The bottom number in the off-target cell refers to the off-targets with mismatches in the 12 bp flanking the PAM sequence, which are the most likely off-targets. Restriction enzymes targeted by the gRNAs for use in the restriction enzyme digest assay are shown. gRNA = guide RNA. PAM = protospacer adjacent motif.

| Primers used 5' >> 3' |                                   |                       |                   |                                  |
|-----------------------|-----------------------------------|-----------------------|-------------------|----------------------------------|
| Name                  |                                   | Purpose               |                   |                                  |
| 1                     | AATATTAAGCTTATGGCGATTTTAGGGCTCTCA | Clone FtsZ cDNA       |                   |                                  |
| 2                     | GTATGCTCTAGACTAAAAGAACAGCCTTCGAGT | Clone FtsZ cDNA       |                   |                                  |
| 3                     | CAGTGGCCATGGATGAAAAGCCTGAACTCACC  | Clone hyg cassette    |                   |                                  |
| 4                     | CGATTTTGAAACCGCGGTGA              | Clone hyg cassette    |                   |                                  |
| 5                     | CCCTGAAGTCAAAGCTCGTC              | Check plants for Cas9 |                   |                                  |
| 6                     | GGCGATCATCTTCCTCACAT              | Check plants for Cas9 |                   |                                  |
| 7                     | GGATTTTCTATCAGTTGGCT              | gRNA 1, 2 RED         |                   |                                  |
| 8                     | AAGAGGATTGCCACCACTAC              | gRNA 1, 2 RED         |                   |                                  |
| 9                     | CTTCTGACTCGTGGGCTTGG              | gRNA 3, 4, 5 RED      |                   |                                  |
| 10                    | CCTGCACAGATCTTTTACGTCC            | gRNA 3, 4, 5 RED      |                   |                                  |
| 11                    | ATGGCGATTTTAGGGCTCTC              | FtsZ CDS RT-PCR       |                   |                                  |
| 12                    | CTAAAAGAACAGCCTTCGAGTAGG          | FtsZ CDS RT-PCR       |                   |                                  |
| 13                    | ACAGTCTGCTGCCGAGA                 | FtsZ qRT-PCR          |                   |                                  |
| 14                    | CTCCGCTGCCTGTTCCC                 | FtsZ qRT-PCR          |                   |                                  |
| 15                    | GATGGTCAGACACGTGAACA              | EF1α qRT-PCR          |                   |                                  |
| 16                    | CCTTGGAGTACTTGGGGGTG              | EF1α qRT-PCR          |                   |                                  |
| gRNAs used 5' >> 3'   |                                   |                       |                   |                                  |
| Name                  | Sequence                          | GC content            | Off-target effect | Corresponding restriction enzyme |
| gRNA1-Fw              | attgAAACACGGATGCTCAAGCAC          | 50                    | 0-0-0-1-12        | BtsI/MutI                        |
| gRNA1-Rv              | aaacGTGCTTGAGCATCCGTGTTT          |                       | 0-0-0-0-0         |                                  |
| gRNA2-Fw              | attgATTGGAGAACTTCTGACTCG          | 45                    | 0-0-1-0-17        | BssSal                           |
| gRNA2-Rv              | aaacCGAGTCAGAAGTTCTCCAAT          |                       | 0-0-0-0-0         |                                  |
| gRNA3-Fw              | attgGCTGCCTGTTCCCTAAAAG           | 55                    | 0-0-0-5-10        | EcoNI                            |
| gRNA3-Rv              | aaacCTTTTAGGGGAACAGGCAGC          |                       | 0-0-0-0-0         |                                  |
| gRNA4-Fw              | attgTTTAGGGGAACAGGCAGCGG          | 60                    | 0-0-0-0-7         | MspA1I                           |
| gRNA4-Rv              | aaacCCGCTGCCTGTTCCCTAAA           |                       | 0-0-0-0-0         |                                  |
| gRNA5-Fw              | attgGCAGGAATGGGTGGAGGTAC          | 60                    | 0-0-2-5-36        | RsaI                             |
| gRNA5-Rv              | aaacGTACCTCCACCCATTCTGTC          |                       | 0-0-0-0-1         |                                  |



**Supplementary Figure S2.** *PCR amplification of FtsZ1 fragments.* PCR was conducted on the 16 down-selected lines with primers 7 & 8 or 9 & 10. Lines 1.2 – 2.9 were amplified with primers 7 & 8. Lines 3.3 – 4.3 were amplified with primers 9 & 10. WT = wild-type. P = primer.

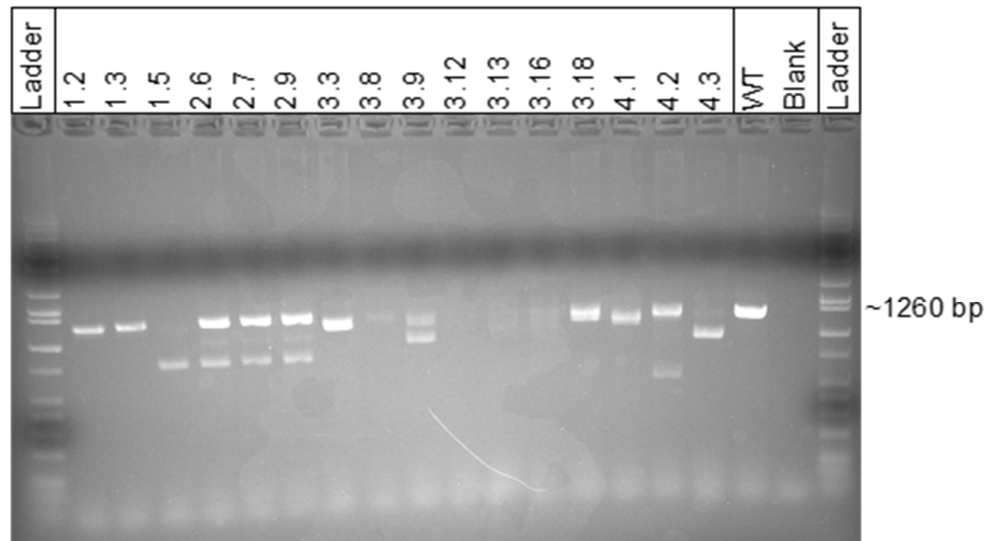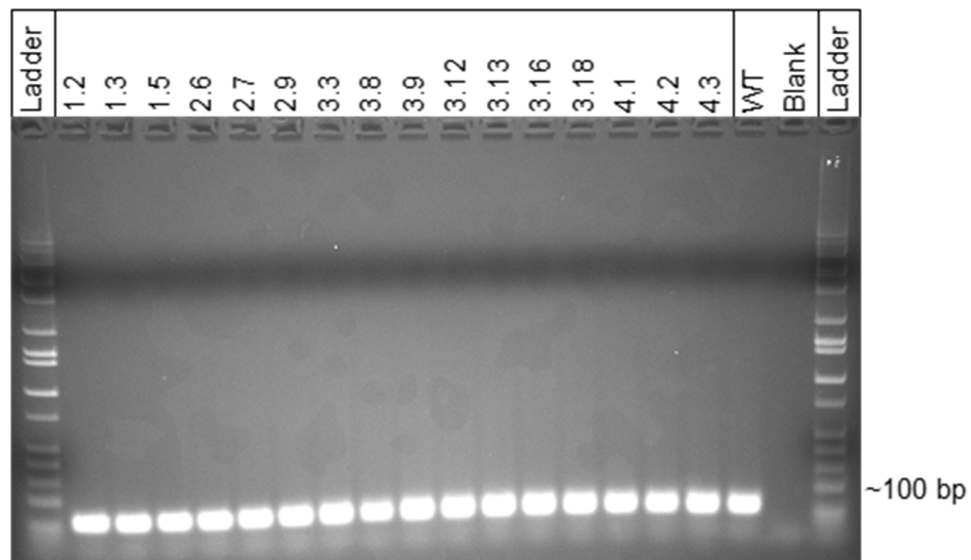

**Supplementary Figure S3.** *FtsZ1 expression patterns.* RT-PCR was conducted on full length 1260 bp coding sequence of FtsZ1 (A). RT-PCR was conducted on 100 bp fragment of EF1 $\alpha$  as a control (B). WT = wild-type.

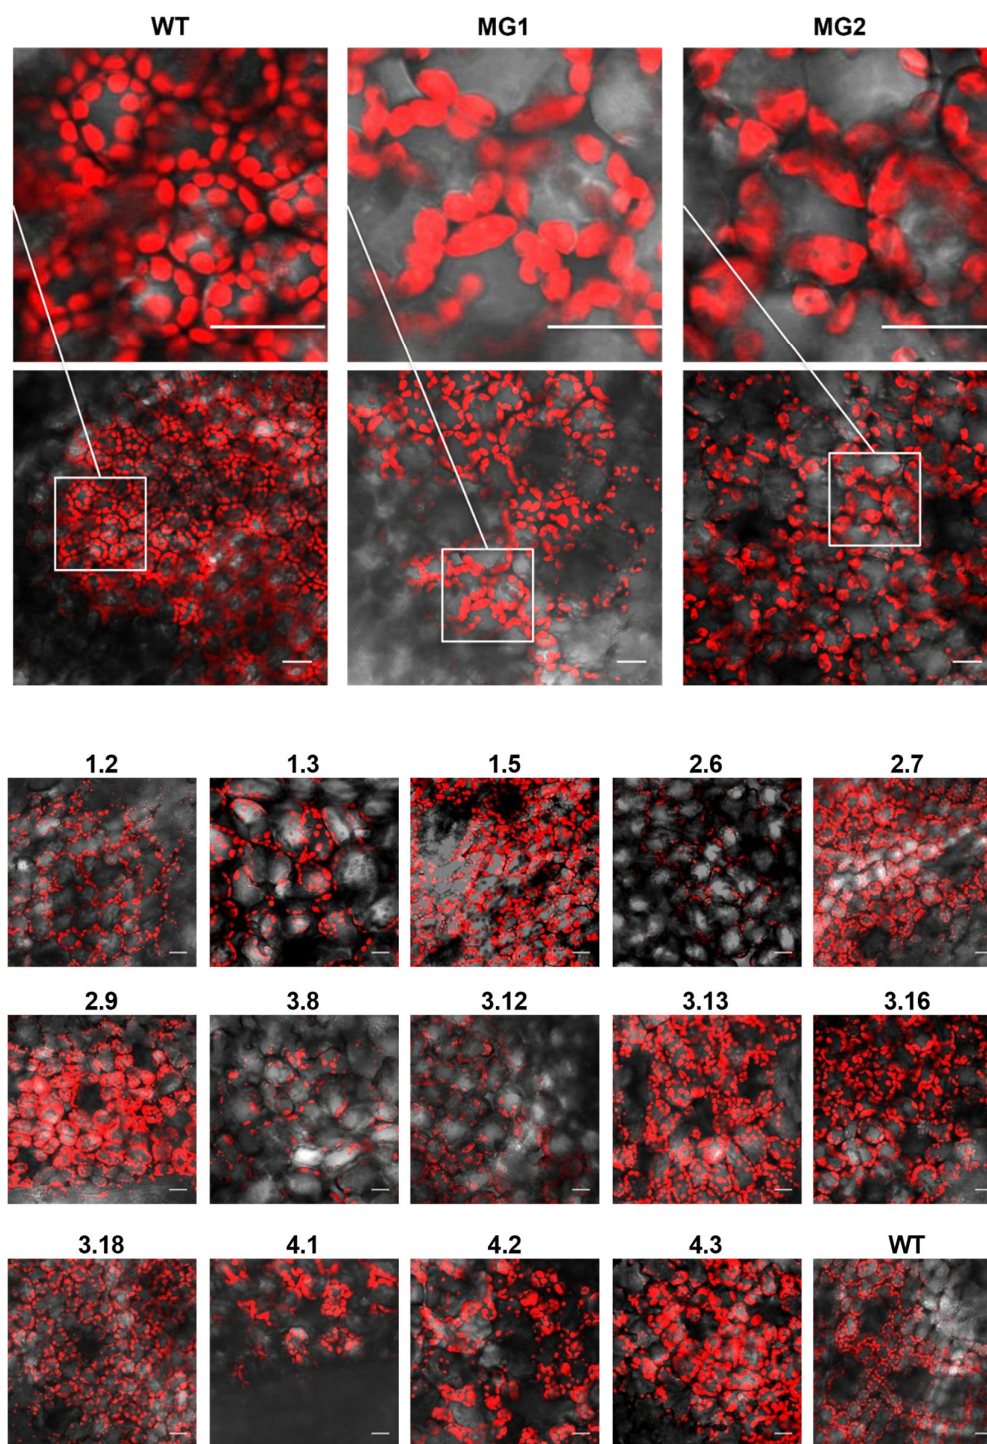

**Supplementary Figure S4.** *Chloroplast morphology by confocal microscopy of large starch granule lines.* Leaf tissue from mutants and wild-type were screened for chloroplast abnormalities. WT = wild-type. MG1 = MacroGranule1. MG2 = MacroGranule2. Scale bar = 25  $\mu$ m.

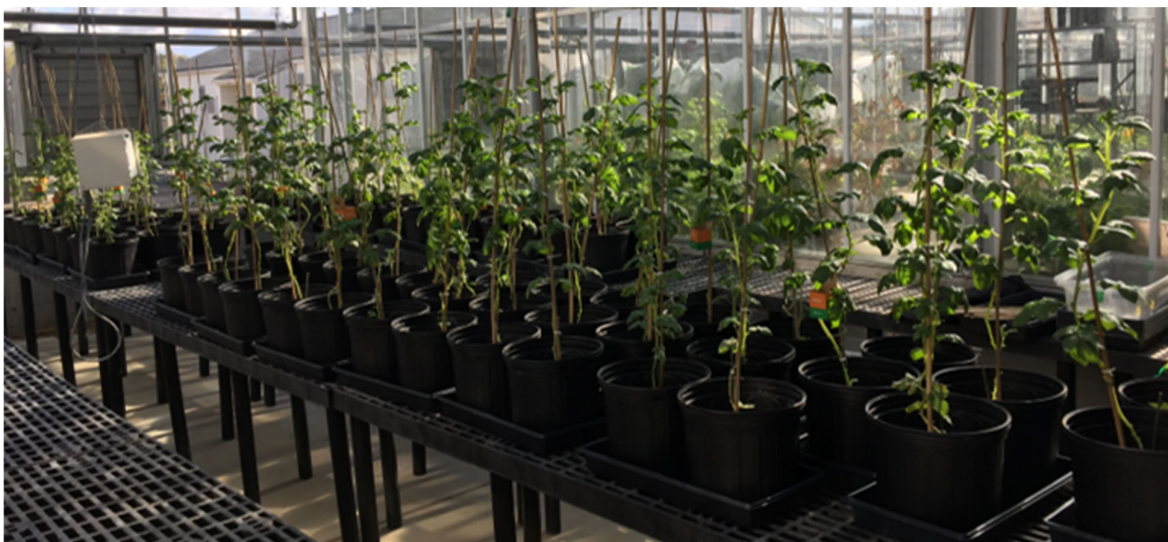

**Supplementary Figure S5.** *Greenhouse production of FtsZ1 mutant potato lines.* Plants were grown in tubers until senescence for the production of tubers.

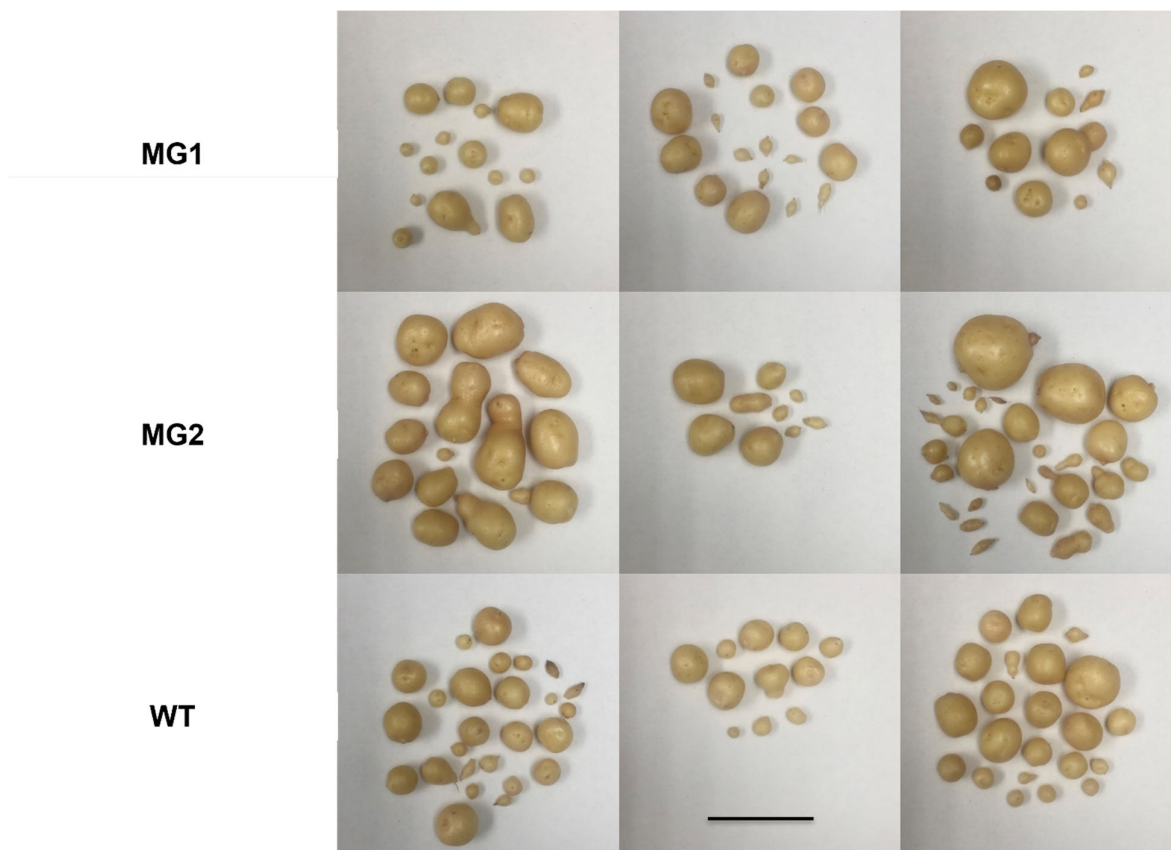

**Supplementary Figure S6.** *Tubers produced from MacroGranule1, MacroGranule2, and WT.* Plants were grown in a greenhouse until senescence to produce tubers. Tubers from three plant replicates were produced and are shown in the different panels. Scale bar = 5 cm. WT = wild-type. MG1 = MacroGranule1. MG2 = MacroGranule2.
